# Supplementary material
Source: MDPI journal article supplement (https://www.mdpi.com/2073-4441/11/11/2340)
Supplement: s1 [file s1]

**Table 1.** Soil classification, including physical and chemical properties.

115 – Imperial-Glenbar silty clay loams (surface texture), 0 to 2 percent slopes

| Physical Properties                                   |                 |                                                                                                                                                         |                   |                                   |               |                  |                                 |                                       |             |                                         |                                   |
|-------------------------------------------------------|-----------------|---------------------------------------------------------------------------------------------------------------------------------------------------------|-------------------|-----------------------------------|---------------|------------------|---------------------------------|---------------------------------------|-------------|-----------------------------------------|-----------------------------------|
| Texture                                               | Glenbar wet 40% |                                                                                                                                                         | Imperial, wet 40% |                                   | Holtville 10% |                  |                                 |                                       |             | Meloland 10%                            |                                   |
| Depth (Inch)                                          | 0"-13"          | 13"-60"                                                                                                                                                 | 0"-12"            | 12"-60"                           | 0"-17"        | 17"-24"          | 24"-35"                         | 35"-60"                               | 0"-12"      | 12"-26"                                 | 26"-71"                           |
| USDA <sup>a</sup> texture                             | Silty clay loam | Clay loam, Silty clay loam                                                                                                                              | Silty clay loam   | Silty clay loam, Silty clay, clay | Silty clay    | Clay, Silty clay | Silt loam, Very fine sandy loam | Loamy very fine sand, Loamy fine sand | Fine sand   | Stratified loamy fine sand to silt loam | Clay, Silty clay, Silty clay loam |
| Classification                                        | Unified         | CL                                                                                                                                                      | CL                | CL                                | CH, CL        | CH, CL           | CH, CL                          | ML                                    | ML, SM      | SM, SP – SM                             | CH, CL                            |
|                                                       | AASHTO          | A-6                                                                                                                                                     | A-6               | A-6                               | A-7           | A-7              | A-7                             | A-4                                   | A-2, A-4    | A-2, A-3                                | A-7                               |
| Liquid limit (range)                                  |                 | 30-40                                                                                                                                                   | 30-40             | 35-40                             | 40-60         | 40-65            | 40-65                           | 25-35                                 | 0-0         | 0-0                                     | 40-65                             |
| Plasticity index (range)                              |                 | 10-15                                                                                                                                                   | 10-15             | 15-20                             | 15-30         | 20-35            | 20-35                           | NP-10                                 | NP          | NP                                      | 20-40                             |
| Composition                                           | Sand (%)        | 7                                                                                                                                                       | 27                | 17                                | 18            | 5                | 22                              | 29                                    | 81          | 94                                      | 26                                |
|                                                       | Silt (%)        | 62                                                                                                                                                      | 42                | 48                                | 42            | 45               | 28                              | 53                                    | 17          | 1                                       | 29                                |
|                                                       | Clay (%)        | 31                                                                                                                                                      | 31                | 35                                | 40            | 50               | 50                              | 18                                    | 3           | 5                                       | 45                                |
| Moist bulk density (gm/cm <sup>3</sup> )              |                 | 1.45-1.55                                                                                                                                               | 1.40-1.50         | 1.45-1.55                         | 1.45-1.55     | 1.35-1.45        | 1.35-1.45                       | 1.40-1.50                             | 1.50-1.60   | 1.60-1.70                               | 1.35-1.45                         |
| Saturated hydraulic conductivity (µm/sec)             |                 | 1.40-4.0                                                                                                                                                | 1.40-4.00         | 1.40-4.00                         | 1.40-4.00     | 0.42-1.40        | 0.42-1.40                       | 4.00-14.00                            | 14.00-42.00 | 14.00-42.00                             | 0.42-1.40                         |
| Available water capacity (inch/inch)                  |                 | 0.15-0.21                                                                                                                                               | 0.15-0.21         | 0.13-0.18                         | 0.10-0.18     | 0.17-0.25        | 0.17-0.25                       | 0.15-0.25                             | 0.08-0.1    | 0.08-0.09                               | 0.06-0.15                         |
| Organic matter (%)                                    |                 | 0.0-1.0                                                                                                                                                 | 0.00-0.5          | 0.0-1.0                           | 0.0-0.5       | 0.50-1.0         | 0.5-0.8                         | 0.0-0.5                               | 0.0-0.0     | 0.5-1.0                                 | 0.0-0.5                           |
| Chemical Properties                                   |                 |                                                                                                                                                         |                   |                                   |               |                  |                                 |                                       |             |                                         |                                   |
| Cation exchange capacity (meq/100gm)                  |                 | 13-20                                                                                                                                                   | 13-20             | 15-22                             | 17-25         | 30-40            | 30-40                           | 10-15                                 | 1.0-5.0     | 10-15                                   | 30-40                             |
| Soil reaction (pH)                                    |                 | 7.9-8.4                                                                                                                                                 | 7.9-8.4           | 7.9-8.4                           | 7.9-8.4       | 7.4-8.4          | 7.4-8.4                         | 7.4-8.4                               | 7.4-8.4     | 7.4-8.4                                 | 7.4-8.4                           |
| Calcium carbonate, CaCO <sub>3</sub> (%)              |                 | 1-5                                                                                                                                                     | 1-5               | 1-5                               | 1-5           | 10-15            | 10-15                           | 10-15                                 | 10-15       | 10-15                                   | 10-15                             |
| Salinity (mmhos/cm)                                   |                 | 2.0-8.0                                                                                                                                                 | 2.0-8.0           | 4.0-8.0                           | 4.0-8.0       | 2.0-8.0          | 2.0-8.0                         | 2.0-8.0                               | 2.0-8.0     | 2.0-8.0                                 | 8.0-16.0                          |
| Sodium adsorption ratio                               |                 | 5-15                                                                                                                                                    | 0-5               | 10-20                             | 5-15          | 5-10             | 5-10                            | 5-10                                  | 5-10        | 0-5                                     | 10-13                             |
| SAGBI rating & class <sup>b</sup>                     |                 | (15 – 29) & 18 – Poor ( <a href="https://sgma.water.ca.gov/webgis/?appid=SGMADDataViewer">https://sgma.water.ca.gov/webgis/?appid=SGMADDataViewer</a> ) |                   |                                   |               |                  |                                 |                                       |             |                                         |                                   |
| CGS Geologic <sup>c</sup>                             |                 | Type Q ( <a href="https://maps.conservation.ca.gov/cgs/gmc/">https://maps.conservation.ca.gov/cgs/gmc/</a> )                                            |                   |                                   |               |                  |                                 |                                       |             |                                         |                                   |
| Drainage class and Hydrologic soil group <sup>d</sup> |                 | Moderately well drained with a hydrologic group (A)                                                                                                     |                   |                                   |               |                  |                                 |                                       |             |                                         |                                   |

<sup>a</sup> United States Department of Agriculture, National Resources Conservation Service

<sup>b</sup> Soil Agricultural Groundwater Banking Index (suitability index for groundwater recharge on agricultural land based on deep percolation, root zone residence time, topography, chemical limitation, and soil surface condition) (<https://casoilresource.lawr.ucdavis.edu/sagbi/>)

<sup>c</sup> Type Q belongs to Pleistocene-Holocene with general lithology as alluvium, lake, playa, and terrace deposits; unconsolidated and semi-consolidated.

<sup>d</sup> Group A for soil having a good infiltration rate with low runoff potential when the soil is not protected by vegetation is thoroughly wet, and receive precipitation from long-duration storms
